# Supplementary material for: Fabrication of circular microfluidic channels by combining mechanical micromilling and soft lithography
Source: Royal Society of Chemistry journal article supplement (doi:10.1039/c0lc00561d), 2011-01-01

Supplementary Material (ESI) for Lab on a Chip

This journal is © The Royal Society of Chemistry 2011

#### SUPPLEMENTARY INFORMATION

***Supplemental Figure 1.*** Result of two-step molding process without the use of a release agent; it is extremely challenging to de-mold PDMS from the positive relief PVS-based mold.

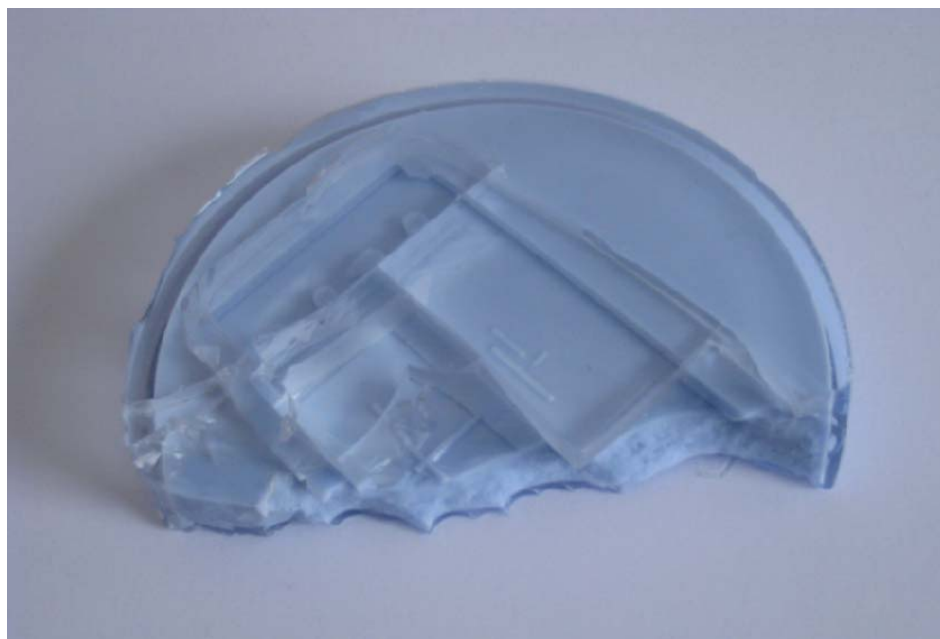

Supplement: c0lc00561d.pdf [file c0lc00561d.pdf]
